# Supplementary material
Source: PubMed Central journal article supplement (PMC9122657)
Supplement: supfigures-final_ddab352.pdf [file supfigures-final_ddab352.pdf]

# Supplemental Figure S1

A

**DUXC and DUXC-ALT HD1 alignment**

```

DUXC      PRRRRLVLTASQK GALQAFFQKNPYPSITAREHLARELAISESRIQ----- 46
          PRRRRLVLTASQK GALQAFFQKNPYPSITAREHLARELAISESRIQ
DUXCALT   PRRRRLVLTASQK GALQAFFQKNPYPSITAREHLARELAISESRIQCRGSLRMGPLVRRM 60

DUXC      -----VWFQNQRTRQLRQS 60
          VWFQNQRTRQLRQS
DUXCALT   TPVSSVFLVSQSASAPYRGLQQLHPLPMRMTKEEMTLVPMP SVVWFQNQRTRQLRQS 118
  
```

B

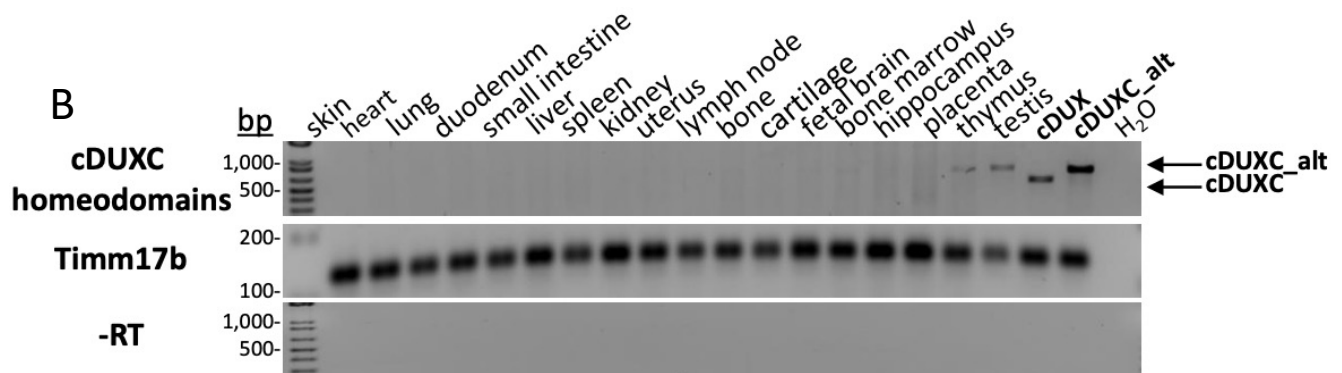

**Figure S1. A.** Sequence alignment of the HD1 domain regions of canine DUXC and DUXC-ALT. **Lower panels:** HD1 and HD2 protein alignments. **B.** RT-PCR of RNA from different canine tissues using primers that will amplify both DUXC and DUXC-ALT shows expression of DUXC-ALT in thymus and testis.

# Supplemental Figure S2

## Homeodomain 1

Mouse RRRRKT V W Q A W Q E Q A L L S T F K K K R Y L S F K E R K E L A K R M G V S D C R I R V W F Q N R R R N R S G E E G  
RRR+ VW Q +AL + F++ Y R+ LA+ +G+ + R+++WFQN R+R + 60% Sim

Human GRRRRL V W T P S Q S E A L R A C F E R N P Y P G I A T R E R L A Q A I G I P E P R V Q I W F Q N E R S R Q L R Q H  
RRRRLV T S Q AL+A F++NPYP I RE LA+ + I E R+Q+WFQN+R+RQLRQ 75% Sim

Dog PRRRRL V L T A S Q K G A L Q A F F Q K N P Y P S I T A R E H L A R E L A I S E S R I Q V W F Q N Q R T R Q L R Q S

## Homeodomain 2

Mouse GRRP R T R L T S L Q L R I L G Q A F E R N P R P G F A T R E E L A R D T G L P E D T I H I W F Q N R R R A R R R H R R  
GRR RT +T Q +L +AFE++ PG A R E E L A R + T G L P E I I W F Q N R R A R + 70% Sim

Human GRRK R T A V T G S Q T A L L L R A F E K D R F P G I A A R E E L A R E T G L P E S R I Q I W F Q N R R A R H P G Q G  
GRRKRT+++ SQT++LL+AFE++RFPGI RE LAR+TGLPE+RIQ+WFQNRRARHPGQ 92% Sim

Dog GRRK R T S I S A S Q T S I L L Q A F E E E R F P G I G M R E S L A R K T G L P E A R I Q V W F Q N R R A R H P G Q S

**Figure S2. The canine DUXC homeodomains show higher similarity to the human than does the mouse.** HD1 alignments show that the canine has 75% similarity to the human, whereas the similarity of human to mouse is 60%. For HD2, canine is 92% similar to human, whereas mouse is 70% similar to human.

# Supplemental Figure S3

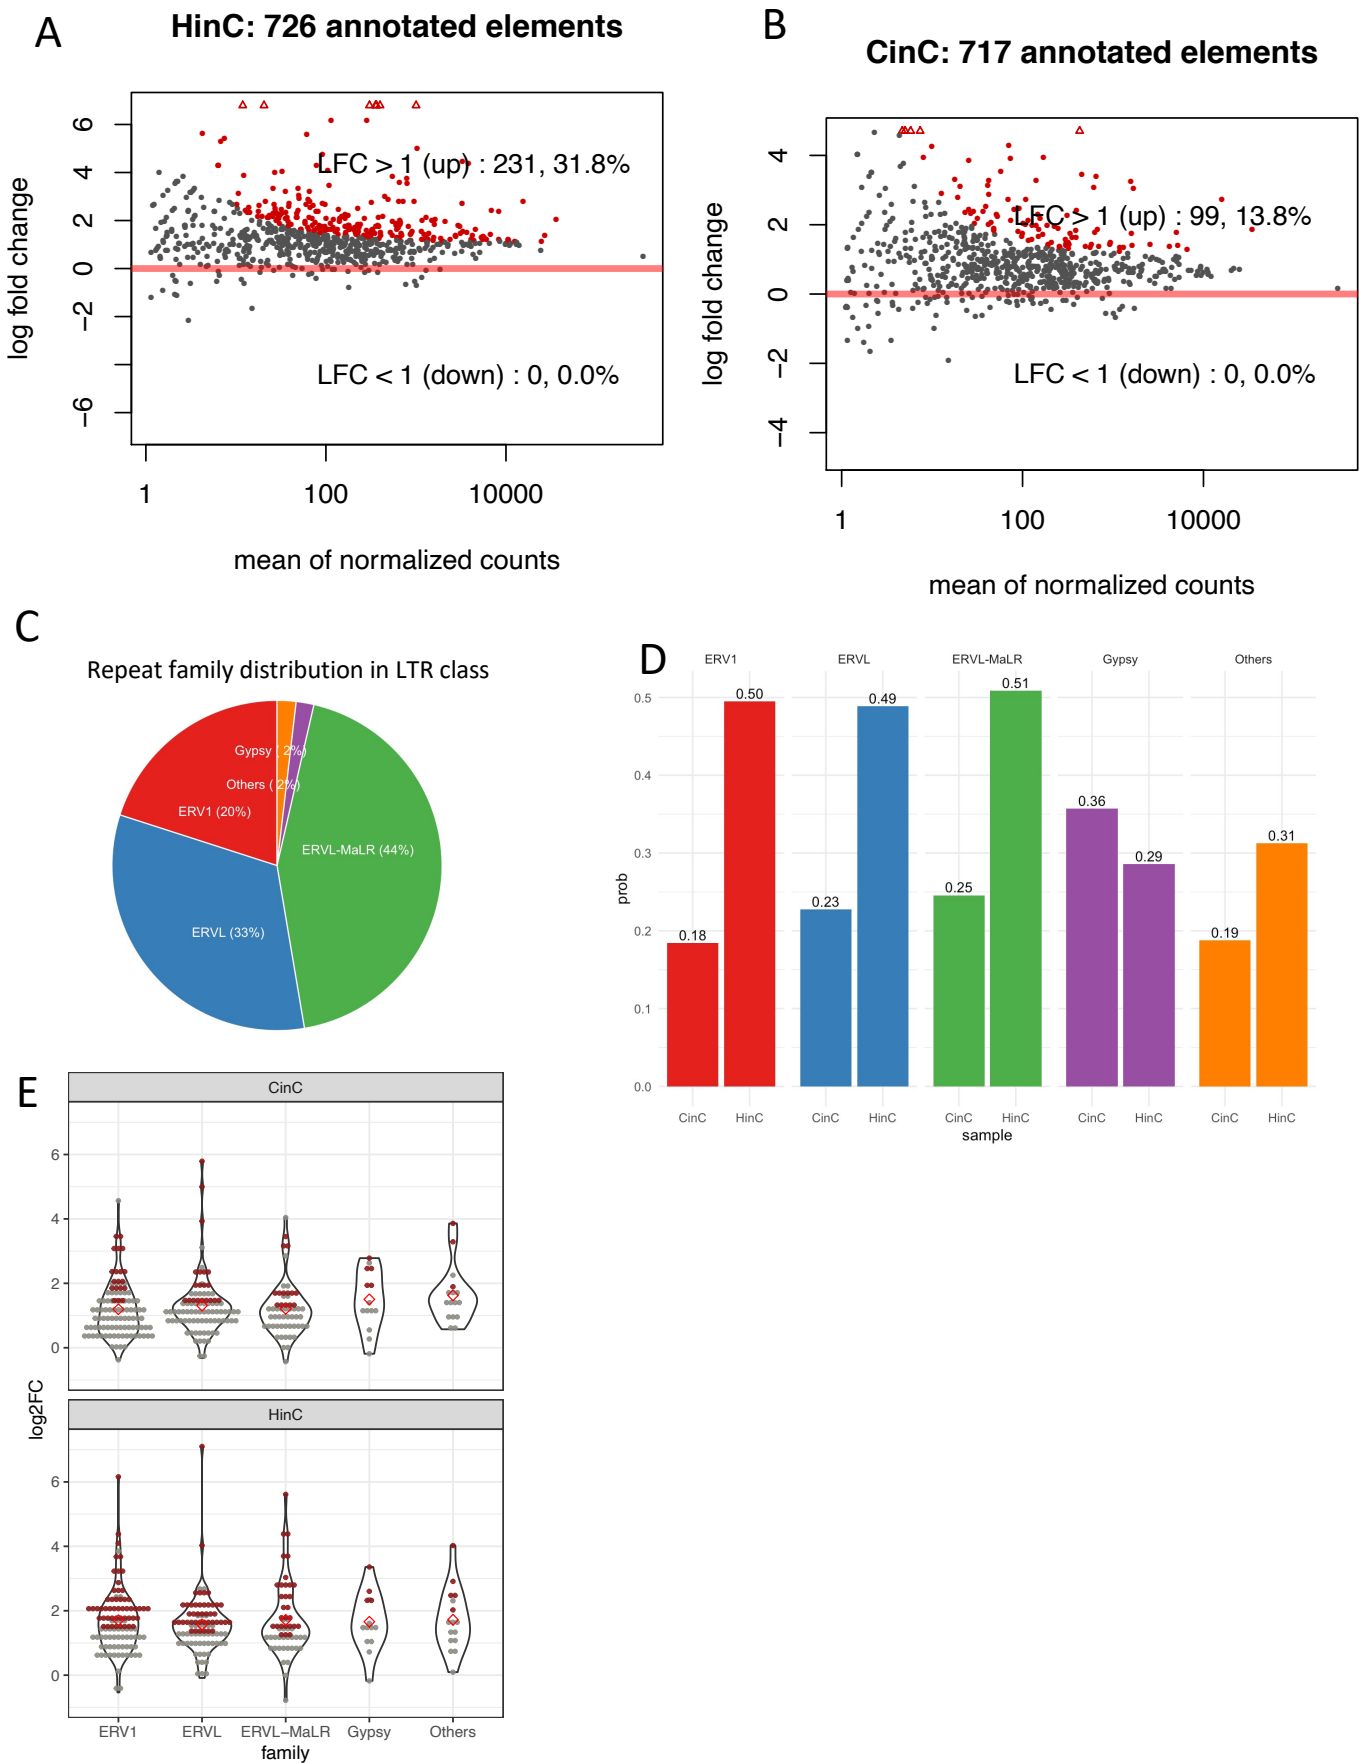

Figure S3. See legend on next page.

**Figure S3. Repeat element different analysis and enriched repeat families .** (A) A traditional MA plot to show the expression of 726 repeat elements in canine muscle cells expressing DUX4 (HinC) compared to a control luciferase vector. The x axis is the mean of normalized counts of each repeat element in the two conditions and y axis is the  $\log_2$  fold change of each element in the two conditions. The red dots represent the differentially expressed repeat elements with adjusted p-value  $< 0.05$  corresponding  $\mathcal{H}_0: |\log FC| \leq 0.5$ . (B) Similar to A showin the expression of 717 repeat elements in canine muscle cells expressing canine DUXC and luciferase (CinC). (C) The repeat family distribution in LTR class. (D) The percentage of differentially expressed elements within each LTR repeat class in HinC and CinC. (E) A violin plot to show the  $\log_2$  expression of each element in the LTR families, with red dots indicating the element is differentially expressed.

# Supplemental Figure S4

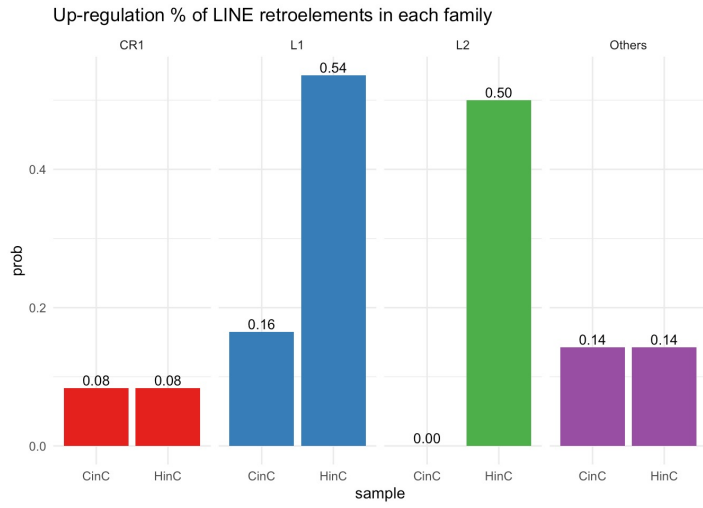

**Figure S4.** A bar plot to show the percentage of up-regulated retroelements in the LINE sub-families of CR1, L1, and L2.
